# Supplementary material for: Research on TNTON/DNTF eutectic characteristics: an exploration of low eutectic mixture based melt-cast explosive carriers
Source: Royal Society of Chemistry journal article supplement (doi:10.1039/d4ra03904a), 2024-01-01
Supplement: d4ra03904a1.pdf [file d4ra03904a1.pdf]

# Research on TNTON/DNTF Eutectic Characteristics: An Exploration of Low Eutectic Mixture based Melt-cast Explosive Carriers

Xinyu Feng<sup>a</sup>, Qi Xue<sup>a</sup>, Junlin Zhang<sup>ab</sup>, Kaidi Yang<sup>a</sup>, Kunkai Wang<sup>a</sup>, Bozhou Wang<sup>\*ab</sup>, Fuqiang Bi<sup>\*ab</sup>

## Supplementary Materials

**Table S1** Apparent activation energy ( $E_a$ ) for different conversion degree for TNTON/DNTF eutectic decomposition reaction

| Conversion degree | $E_a/\text{kJ mol}^{-1}$ | $\pm\text{Error} / (\text{kJ/mol})$ |
|-------------------|--------------------------|-------------------------------------|
| 0.01              | 127.340                  | 32.965                              |
| 0.02              | 127.340                  | 24.047                              |
| 0.03              | 118.551                  | 16.064                              |
| 0.04              | 113.078                  | 12.211                              |
| 0.05              | 110.327                  | 9.323                               |
| 0.06              | 109.158                  | 8.720                               |
| 0.07              | 108.661                  | 8.015                               |
| 0.08              | 108.410                  | 7.581                               |
| 0.09              | 108.228                  | 7.536                               |
| 0.10              | 108.061                  | 7.517                               |
| 0.11              | 107.880                  | 7.432                               |
| 0.12              | 107.657                  | 7.546                               |
| 0.13              | 107.365                  | 7.640                               |
| 0.14              | 106.988                  | 7.717                               |
| 0.15              | 106.557                  | 7.953                               |
| 0.16              | 106.129                  | 8.265                               |
| 0.17              | 105.776                  | 8.527                               |
| 0.18              | 105.500                  | 8.717                               |
| 0.19              | 105.245                  | 8.885                               |
| 0.20              | 104.902                  | 9.032                               |
| 0.21              | 104.410                  | 9.344                               |
| 0.22              | 103.776                  | 9.697                               |
| 0.23              | 103.072                  | 10.058                              |

|      |         |        |
|------|---------|--------|
| 0.24 | 102.398 | 10.397 |
| 0.25 | 101.853 | 10.718 |
| 0.26 | 101.488 | 11.013 |
| 0.27 | 101.257 | 11.275 |
| 0.28 | 101.026 | 11.522 |
| 0.29 | 100.659 | 11.984 |
| 0.3  | 100.106 | 12.424 |
| 0.31 | 99.419  | 12.454 |
| 0.32 | 98.680  | 12.734 |
| 0.33 | 97.945  | 13.051 |
| 0.34 | 97.231  | 13.363 |
| 0.35 | 96.543  | 13.670 |
| 0.36 | 95.891  | 13.970 |
| 0.37 | 95.289  | 14.265 |
| 0.38 | 94.734  | 14.746 |
| 0.39 | 94.193  | 15.367 |
| 0.40 | 93.629  | 15.557 |
| 0.41 | 93.025  | 15.492 |
| 0.42 | 92.399  | 15.442 |
| 0.43 | 91.776  | 15.638 |
| 0.44 | 91.162  | 15.848 |
| 0.45 | 90.528  | 16.061 |
| 0.46 | 89.825  | 16.277 |
| 0.47 | 88.998  | 16.564 |
| 0.48 | 88.032  | 17.039 |
| 0.49 | 86.978  | 17.514 |
| 0.5  | 85.933  | 17.985 |
| 0.51 | 85.013  | 17.709 |
| 0.52 | 84.269  | 17.490 |
| 0.53 | 83.682  | 17.275 |
| 0.54 | 83.157  | 17.253 |
| 0.55 | 82.605  | 17.275 |
| 0.56 | 81.963  | 17.386 |
| 0.57 | 81.226  | 17.579 |
| 0.58 | 80.416  | 17.774 |
| 0.59 | 79.558  | 17.970 |
| 0.6  | 78.655  | 18.167 |
| 0.61 | 77.695  | 18.148 |
| 0.62 | 76.697  | 17.675 |
| 0.63 | 75.720  | 17.189 |
| 0.64 | 74.856  | 16.935 |
| 0.65 | 74.143  | 16.839 |
| 0.66 | 73.566  | 16.738 |
| 0.67 | 73.055  | 16.630 |
| 0.68 | 72.553  | 16.516 |
| 0.69 | 72.013  | 16.396 |
| 0.70 | 71.401  | 16.269 |
| 0.71 | 70.698  | 15.858 |
| 0.72 | 69.918  | 15.404 |
| 0.73 | 69.127  | 15.104 |

|      |        |        |
|------|--------|--------|
| 0.74 | 68.410 | 14.809 |
| 0.75 | 67.841 | 14.529 |
| 0.76 | 67.418 | 14.266 |
| 0.77 | 67.092 | 14.032 |
| 0.78 | 66.793 | 13.772 |
| 0.79 | 66.483 | 13.538 |
| 0.80 | 66.134 | 13.432 |
| 0.81 | 65.743 | 13.346 |
| 0.82 | 65.353 | 13.297 |
| 0.83 | 65.055 | 13.263 |
| 0.84 | 64.907 | 13.232 |
| 0.85 | 64.883 | 13.438 |
| 0.86 | 64.894 | 13.666 |
| 0.87 | 64.880 | 13.913 |
| 0.88 | 64.849 | 14.188 |
| 0.89 | 64.862 | 14.558 |
| 0.90 | 64.946 | 14.872 |
| 0.91 | 65.082 | 15.214 |
| 0.92 | 65.197 | 15.741 |
| 0.93 | 65.259 | 16.073 |
| 0.94 | 65.226 | 16.458 |
| 0.95 | 65.051 | 17.153 |
| 0.96 | 64.621 | 17.468 |
| 0.97 | 63.856 | 18.165 |
| 0.98 | 62.766 | 18.945 |
| 0.99 | 61.478 | 19.740 |

---
